# Supplementary material
Source: PubMed Central journal article supplement (PMC3858988)
Supplement: 10-1055-s-0033-1350890-sup_gf694.pdf [file 10-1055-s-0033-1350890-sup_gf694.pdf]

# Herausforderungen und Kontroversen bei der operativen Therapie der Endometriose

## Surgical Therapy of Endometriosis: Challenges and Controversies

### Autoren

S. Rimbach<sup>1</sup>, U. Ulrich<sup>2</sup>, K. W. Schweppe<sup>3</sup>

### Institute

<sup>1</sup> Gynäkologie und Geburtshilfe, Landeskrankenhaus Feldkirch, Feldkirch, Österreich

<sup>2</sup> Klinik für Gynäkologie und Geburtshilfe, Martin-Luther-Krankenhaus, Berlin

<sup>3</sup> Endometriose-Zentrum Ammerland, Westerstede

### Schlüsselwörter

- Reproduktionsmedizin
- Dyspareunie
- Endometriose
- Gynäkologie
- Infertilität
- Ovar

### Key words

- reproductive medicine
- dyspareunia
- endometriosis
- gynaecology
- infertility
- ovary

### Zusammenfassung

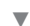

Die Endometriose gehört zu den häufigsten Krankheitsbildern in der operativen Gynäkologie mit erheblichen Herausforderungen an die laparoskopische Technik, aber auch die OP-Planung, Patientinnenaufklärung und Interdisziplinarität. Ziel im Hinblick auf eine bestmögliche Symptomkontrolle ist die vollständige Entfernung der erkennbaren Krankheitsherde, die aber limitiert wird durch nachweisliche Grenzen der Detektierbarkeit und die Risiken radikaler Operationsstrategien. So kann die Exzision ovarieller Endometriome zu einer signifikanten Beeinträchtigung der Ovarialfunktion, die Läsion nervaler Strukturen bei der Resektion tief-infiltrierender Endometriose der Sakrouterinligamente, der Parametrien, des Septum rectovaginale und des Vaginalpols zu schwerwiegenden Funktionsbeeinträchtigungen wie Blasenentleerungsstörungen führen. Eine gründliche Nutzen-Risiko-Abwägung muss daher symptomorientiert erfolgen und in einem individualisierten Vorgehen resultieren.

### Abstract

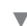

Endometriosis is one of the most common disorders encountered in surgical gynaecology. The laparoscopic technique, the planning of the surgical intervention, the extent of information provided to patients and the interdisciplinary coordination make it a challenging intervention. Complete resection of all visible foci of disease offers the best control of symptoms. However, the possibility of achieving this goal is limited by the difficulty of detecting all foci and the risks associated with radical surgical strategies. Thus, the excision of ovarian endometrioma can result in a significant impairment of ovarian function, while damage to nerve structures during resection of the uterosacral ligaments, the parametrium, the rectovaginal septum or the vaginal cuff to treat deep infiltrating endometriosis can lead to serious functional impairments such as voiding disorders. A detailed risk-benefit analysis is therefore necessary, and patients must be treated using an individual approach.

eingereicht 4. 8. 2013

revidiert 4. 9. 2013

akzeptiert 4. 9. 2013

### Bibliografie

**DOI** <http://dx.doi.org/10.1055/s-0033-1350890>  
 Geburtsh Frauenheilk 2013; 73:  
 1–6 © Georg Thieme Verlag KG  
 Stuttgart · New York ·  
 ISSN 0016-5751

### Korrespondenzadresse

**Priv.-Doz. Dr. Stefan Rimbach**  
 Landeskrankenhaus Feldkirch  
 Gynäkologie und Geburtshilfe  
 Carinagasse 47  
 6800 Feldkirch  
 Österreich  
[stefan.rimbach@vlkh.net](mailto:stefan.rimbach@vlkh.net)

### Einleitung

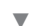

Die Endometriose gehört zu den häufigsten Krankheitsbildern in der Gynäkologie und gleichzeitig zu den größten Herausforderungen für den gynäkologischen Operateur [1]. Leitlinienorientiertes Vorgehen [2], operativ-technische Erfahrung und Interdisziplinarität [3] sind Voraussetzungen für eine erfolgreiche Therapie.

Unabdingbar für die Indikationsstellung, Planung und Durchführung eines operativen Eingriffs bei Endometriose sind die präzise anamnestische Erfassung der individuellen Symptomatik, eine adäquate Diagnostik und besondere operative Fer-

tigkeiten [4]. Voraussetzung ist darüber hinaus, sich als Operateur und v. a. auch die betroffene Patientin mit den „schwierigen“, z.T. kontroversen und möglicherweise komplikationsträchtigen Aspekten des Eingriffs zu konfrontieren.

Hierzu zählen individuelle Risiken, wie etwa eine Rezidivsituation, ebenso wie erkrankungsimmanente und operationstechnische Faktoren. Im Folgenden sollen einige derartige Konstellationen diskutiert werden, die aufgrund ihres typischen Charakters und ihrer potenziell schwerwiegenden Konsequenzen besondere Aufmerksamkeit verdienen.

## Ausmaß des Eingriffs und Umgang mit unerwarteten Befunden

Sowohl aus Sicht des Operateurs als auch aus Sicht der betroffenen Patientin gehören der Umfang der tatsächlichen Krankheitsmanifestation und damit verbunden das Ausmaß des beabsichtigten Eingriffs zu den bedeutendsten, aber präoperativ am schwersten zu beurteilenden Faktoren. Nicht selten wird dies erst intraoperativ erkennbar.

Die Resektionslinien sind in erster Linie von der Ausdehnung der Erkrankung selbst bestimmt. Ziel ist die vollständige Entfernung, ggf. mit Darmresektionen oder Eingriffen an ableitenden Harnwegen und Blase [5–11].

Neben der entsprechenden Erfahrung des Operateurs sind in diesem Zusammenhang Interdisziplinarität und eine umfangreiche Einbindung der Patientin in die Planung bedeutsam. Trotz adäquater Diagnostik kann sich die Notwendigkeit zu einer Erweiterung des primär vorgesehenen Eingriffs aber auch intraoperativ unerwartet ergeben, so z. B. bei Darmbeteiligung jenseits des Septum rectovaginale oder nicht obstruktiver Ureterbeteiligung (● **Abb. 1 a** und **b**).

Diese nicht untypische Konstellation stellt grundsätzlich eine erhebliche Herausforderung für die routinemäßige Gestaltung der präoperativen Aufklärung und die Operationslogistik dar. Als Lösungsansatz konkurrieren eine flexible Operationsstrategie mit maximaler Aufklärung über alle Eventualitäten mit einem für diese Konstellation vereinbarten 2-zeitigen Vorgehen. Abzuwägen wird im individuellen Fall die psychische Belastung der Patientin durch eine möglicherweise viel zu weit gehende Aufklärung und je nach Abteilungsstruktur auch die möglicherweise unnötige Blockierung der OP-Saalkapazität und interdisziplinären Personalressource gegenüber den Nachteilen einer Zweitoperation sein.

In jedem Fall empfiehlt sich eine klare Positionierung im Rahmen der präoperativen Planung, um Überraschungen vorzubeugen. Neben der Ausdehnung der Endometriosemanifestation selbst beeinflussen auch Sekundärfaktoren wie das Vorhandensein von Adhäsionen und, bezogen auf das Retroperitoneum, von bindegewebigen Vernarbungen den Umfang des Eingriffs erheblich. Durch die genannten Faktoren kann die Anatomie derart verändert sein, dass es ausgedehnter Präparation bedarf, diese wiederherzustellen. Darmadhäsio lysen ebenso wie langstreckige Ureteroly sen können notwendig werden, um die zu exstirpierende Endometriose überhaupt zu erreichen oder um eine iatrogene Läsion der genannten Strukturen im Randbereich der endometriotischen Manifestation zu vermeiden. Gleichzeitig ist eben gerade diese Präparation selbst mit einem Verletzungsrisiko behaftet.

Auch diese keineswegs seltenen, sondern v. a. bei der tief infiltrierenden Endometriose eher typischen Aspekte erfordern präoperatives Bewusstsein und entsprechende Erörterung.

## Grenzen der Detektierbarkeit endometriotischer Läsionen und Abgrenzung zum gesunden Gewebe

Eine Herausforderung besteht in der Detektion und Abgrenzung endometriotischer Befunde zum gesunden Gewebe (● **Abb. 2**), v. a. bei Rezidiven.

Von n = 39 Patientinnen mit Beschwerdepersistenz nach Exzision oder Ablation einer histologisch gesicherten Endometriose fanden sich bei erneuter Laparoskopie peritoneale Rezidive in 37%.

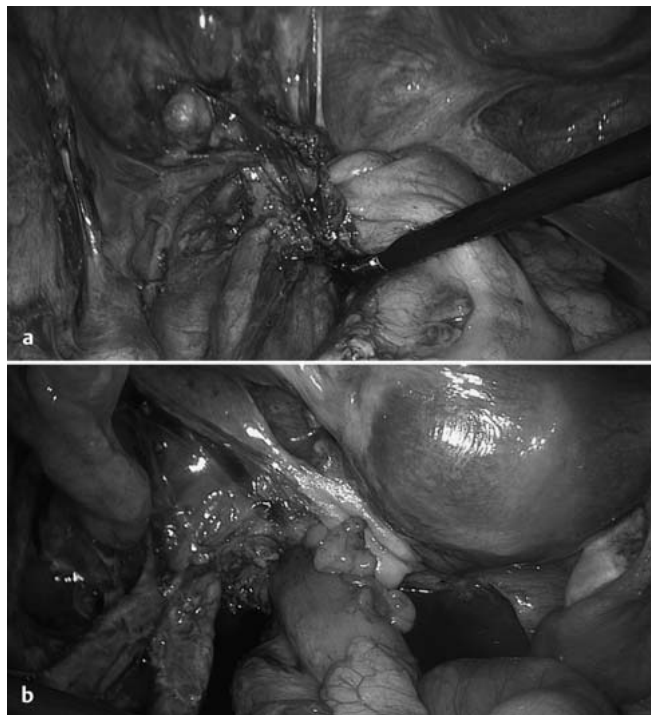

**Abb. 1 a** und **b** **a** Ureterbeteiligung links bei Endometriose des Rektosigmoids. **b** Nach Ureterolyse und Rektosigmoid-Resektion.

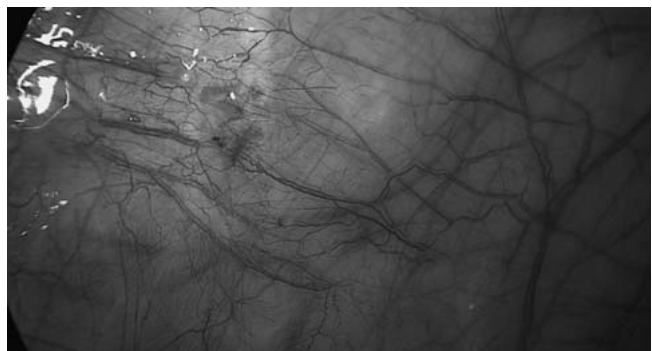

**Abb. 2** Peritoneale Endometriose unklarer Ausdehnung: rote Läsionen mit typischem Gefäßmuster, daneben narbige Peritonealdefekte.

Das Rezidiv trat signifikant häufiger auf in einem bereits voroperierten (RR 2,54; 95%-Konfidenzintervall 1,63–3,97) oder unmittelbar angrenzenden (RR 1,29; 95%-Konfidenzintervall 0,84–2,0) Areal als distant zur ursprünglichen Lokalisation, was die Hypothese einer wahrscheinlich primär inkompletten Entfernung unterstützt [12]. Verantwortlich hierfür könnte sein, dass endometriosebedingte Läsionen des Peritoneums weit über die sichtbaren Herde hinaus reichen können, wie elektronenmikroskopische Untersuchungen nahelegen [13]. Möglicherweise erklärt das Vorhandensein residueller Endometrioseherde bei einer Reihe von Patientinnen den Erfolg eines die Operation begleitenden hormonellen Therapieansatzes. Diese Interpretation wird gestützt durch die Ergebnisse einer prospektiv-randomisierten Studie an 450 Patientinnen, in der die ausschließlich chirurgische oder ausschließlich hormonelle mit der kombinierten Therapie verglichen wurde. Die signifikant besten Ergebnisse erzielte der

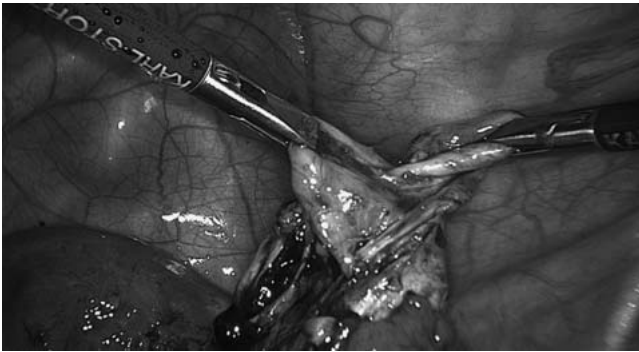

**Abb. 3** Ovarialendometriose rechts, schichtgerechte Präparation.

kombinierte Ansatz mit 60% Therapieerfolg gemessen an den klinischen Parametern Dysmenorrhö und Dyspareunie sowie den Befunden in der Second-Look-Laparoskopie, gegenüber 55 bzw. 50% bei ausschließlich hormonellem bzw. chirurgischem Ansatz [14].

### Radikalität der Präparation, Chancen und Risiken

#### ▼ Peritoneale Endometriose

Vor dem Hintergrund bestehender Unsicherheit in der Detektion der Grenzen endometriotischer Läsionen und nicht zuletzt auch den vergleichbar guten Ergebnissen einer alleinigen endokrinen Therapie als Alternative zur Operation wenigstens für die peritoneale Erkrankungsmanifestation [15, 16] ist hier im Einzelfall das Ausmaß der Exzision abzuwägen gegen das Risiko einer Übertherapie.

#### Ovarielle Endometriose

Neben der peritonealen stellt die ovarielle Manifestation der Endometriose die zweithäufigste Lokalisation dar. Auch die daher vermeintlich zur Routine gehörende operative Therapie des ovariellen Endometrioms birgt spezielle Herausforderungen für den Operateur.

Dieser bewegt sich in Anbetracht von Rezidivraten zwischen 9,6–45,5% [17, 18] zwischen dem Anspruch auf eine adäquate Entfernung und dem Risiko einer iatrogenen Schädigung der ovariellen Reserve. AMH-Analysen haben gezeigt, dass es in Verbindung mit ovariellen Endometrioseoperationen zu signifikanten Konzentrationsabfällen kommen kann [19–21]. Bereits nach einseitiger Operation war eine Reduktion um 24%, bei bilateralem Eingriff bis 67% beobachtet worden [22, 23].

Eine schichtgerechte Präparationstechnik (► **Abb. 3**) durch einen erfahrenen Operateur mit besonderer Schonung des ovariellen Hilus werden zur Optimierung des operativ-technischen Vorgehens empfohlen [24–26]. Vorteile lassen sich nachweisen, bestätigt durch eine umfangreiche Metaanalyse, für die Exzision gegenüber der elektrochirurgischen Ablation [27–29]. So fanden sich in der genannten Metaanalyse [29], in der die Daten von 7 Studien ausgewertet wurden, nach Exzision im Vergleich zur Ablation ein signifikant reduziertes Risiko für das Wiederauftreten von Symptomen (RR 0,29; 95%-Konfidenzintervall 0,15–0,55;  $p < 0,001$ ) sowie signifikant reduzierte Rezidivraten (RR 0,50; 95%-Konfidenzintervall 0,26–0,97;  $p = 0,04$ ). Die Rezidivraten waren geringer nach Exzision auch im Vergleich zur Laservaporisation (RR 0,33; 95%-Konfidenzintervall 0,12–0,88;  $p = 0,03$ ). Bezogen

auf erzielte Schwangerschaften fanden sich nach Exzision gegenüber HF-Koagulation signifikant bessere Raten (RR: 2,64; 95%-Konfidenzintervall 1,49–4,69;  $p < 0,001$ ), nicht aber im Vergleich zur Laservaporisation (RR: 0,92; 95%-Konfidenzintervall 0,30–2,80;  $p = 0,89$ ). Die Daten zur ovariellen Reserve ließen in dieser Metaanalyse keine Analyse zu.

Die postulierte Vermeidung der ovariellen Funktionsbeeinträchtigung durch Ersatz bipolarer Koagulation durch eine hämostatische Naht [30] konnte in einer prospektiv randomisierten Studie nicht bestätigt werden, vielmehr kam es unabhängig von der verwendeten Technik zum AMH-Abfall [31].

Die Indikation zum operativen Vorgehen erfordert daher eine Abwägung des möglichen Benefits bei Schmerzsymptomatik oder bei durch das Endometrium erschwerter Follikelpunktion im Rahmen des IVF gegenüber einer möglicherweise signifikanten Beeinträchtigung der ovariellen Reserve [32]. Unberührt davon bleibt die klare Anzeige zur histologischen Abklärung einer unklaren ovariellen Raumforderung.

#### Tief infiltrierende Endometriose

Die Indikation zur operativen Therapie der tief infiltrierenden Endometriose besteht in der Regel in einer ausgeprägten Schmerzsymptomatik. Erfolgt die Exzision komplett, was ggf. eine Ausdehnung des Eingriffs auf Vagina, Darm und ableitende Harnwege erfordert, besteht nachweislich die Chance, Symptomkontrolle und Rezidivreduktion zu erzielen [7, 33–35]. Die überwiegende Zahl der Eingriffe kann erfolgreich laparoskopisch durchgeführt werden mit Konversionsraten von etwa 1,6–12% [36–38].

Die Herausforderung liegt neben der anspruchsvollen operativen Technik, für die ein hoher Spezialisierungsgrad erforderlich ist, auch in der Planung und Indikationsstellung. Gegebenenfalls muss eine Risiko-Nutzen-Abwägung erfolgen zwischen pathoanatomischer Radikalität und eingeschränktem Vorgehen. Kontrovers wird diskutiert, ob letzteres die Rezidivwahrscheinlichkeit möglicherweise gar nicht erhöht, wenn die zurückbleibenden Manifestationen, etwa am Darm oder in der Vagina, präoperativ asymptomatisch waren [39], was naturgemäß allerdings nicht immer gut abgeschätzt werden kann.

Zwar liegen in spezialisierten Zentren die Rate unmittelbar postoperativer Komplikationen mit 2–4% [8, 9], die Gesamtrate schwererer Komplikationen mit 7–9% [36–38, 44] und die Rezidivrate mit 8–13% [38, 40–42] in Anbetracht der Komplexität der Eingriffe numerisch in einem scheinbar „akzeptablen“ Bereich, der potenziell schwerwiegende Charakter möglicher Früh- und Spät komplikationen sowie unerwünschter Begleit- und Folgezustände ist für die betroffene Frau gleichwohl eine im Einzelfall kaum zu ertragende Situation.

Die zu berücksichtigenden Faktoren reichen dabei von allgemeinen, den Umfang des Eingriffs betreffenden Risiken bis zu spezifischen Aspekten der Endometriosechirurgie.

So wurde unabhängig von der Diagnose einer Endometriose die lange OP-Dauer in extremer Kopftieflage in Fallberichten mit dem Auftreten schwerer Kompartment-Syndrome der unteren Extremität in kausalen Zusammenhang gebracht [43, 44].

Endometriosespezifisch stellt aufgrund ihrer relativen Häufigkeit v. a. die kolorektale Chirurgie einen wichtigen Faktor dar. Nach Segmentresektion wurden Revisionseingriffe innerhalb der 1. Woche in einer Fallserie in immerhin 4,1% notwendig [9]. Über Anastomoseninsuffizienzen wurde in 0,7–3% [36, 45] berichtet. In 3–14,5%, in einer Studie sogar fast regelhaft mit 95,2% erfolgte die Anlage eines protektiven Ileostomas [36, 38, 45, 46]. Aus

darmchirurgischer Sicht stellt dies zweifelsfrei keine Komplikation, sondern vielmehr eine notwendige Maßnahme zur Komplikationsvermeidung dar, für die betroffene, junge Endometriosepatientin jedoch nicht selten eine Hürde im Entscheidungsprozess, sich dem Eingriff überhaupt zu unterziehen.

Ebenfalls nach Segmentresektion wurden in einer anderen Studie spätere Funktionsbeeinträchtigungen in Form von schwerer Obstipation oder pathologisch vermehrter Stuhlfrequenz bei 52%, nach Vollwandexzision aber nur in 19% beobachtet [47]. Ziel der intraoperativen Anpassung ist daher ein Vorgehen möglichst reduzierter Radikalität. Zur Anwendung kommen die sogenannte Shaving-Technik mit Erhalt der Darmwand [42] und die kontinuitäts-erhaltende Vollwandresektion anstelle der Segmentresektion [48, 49]. Hierzu gibt es leider keine vergleichenden prospektiven Studien. Die adäquate, vollständige Entfernung des Endometrioseknotens muss aber gewährleistet bleiben, da ansonsten ein erhöhtes Rezidivrisiko besteht. So erhöhte sich die Rezidivrate von 2,19% bei Segmentresektion und 5,17% bei kompletter Exzision der vorderen Rektumwand signifikant auf 22,2% in der bereits genannten Studie von Brouwer bei wahrscheinlich inkompletter Dissektion im Bereich der Rektumwand [45].

Vor allem bei zusätzlicher partieller Kolpektomie wurde in einer anderen Studie über schwere urologische Komplikationen wie Stauungs-Hydronephrosen in 4,8%, Fisteln in 3% und Blasenentleerungsstörungen in 28,9% berichtet [50].

Als ursächlich verantwortlich für die Blasenfunktionsstörung, die mit einer durchschnittlichen Häufigkeit von 15–30% angegeben wird (in milder und in der Regel passagerer Form aber die Mehrzahl aller Patientinnen nach komplexer Resektion tief infiltrierender Endometriose betrifft) und die bis zur dauerhaften Notwendigkeit der Selbstkatheterisierung gehen kann, müssen wahrscheinlich Läsionen autonomer Nervenplexus, insbesondere des Plexus hypogastricus inferior im proximalen Lig. sacrouterinum, angesehen werden, die bei Resektionen im Bereich der Sakrouterinligamente selbst, der Parametrien, des tiefen Rektums und des Vaginalpols eintreten können [51–53] (● **Abb. 4a** und **b**). Gelingt eine intraoperative Identifikation und Schonung der nervalen Strukturen, kann die Rate an postoperativen Funktionsstörungen möglicherweise gesenkt werden [54, 55].

An eine Mitbeteiligung des Ureters muss stets gedacht werden bei Nachweis einer Hydronephrose, die Besonderheit liegt aber darin, dass sie auch völlig symptomfrei sein kann [56]. Bei Endometriose im Bereich des Sakrouterinligaments mit einer Ausdehnung über 3 cm wurde eine Wahrscheinlichkeit der Ureterbeteiligung von 17,9% beschrieben gegenüber nur 1,6% bei kleineren Knoten [57]. In der Mehrzahl der Fälle kann eine Ureterolyse erfolgreich sein, angegeben werden 53,8–73,3% [56, 58, 59], immerhin mit einer Komplikationsrate von 23–31,4% [58, 59].

### Besondere Situationen: Adoleszenz und Rezidiv

▼ Beide Situationen stellen, obwohl völlig unterschiedlich, den Operateur vor dieselbe Frage nach Nutzen versus Risiko eines invasiven bzw. erneuten invasiven Vorgehens.

In der Adoleszenz führt Scheu vor der Invasivität einer Laparoskopie möglicherweise zu einer Diagnoseverschleppung um Jahre [60]. Inwieweit sich Daten einer Erhebung, nach der bei Mädchen mit therapieresistentem chronischem Unterbauchschmerz und Dysmenorrhö Endometriose mit einer Prävalenz von 70–75% gefunden wird [61], reproduzieren lassen, bleibt weiteren systematischen Untersuchungen vorbehalten. Auch die wenigen

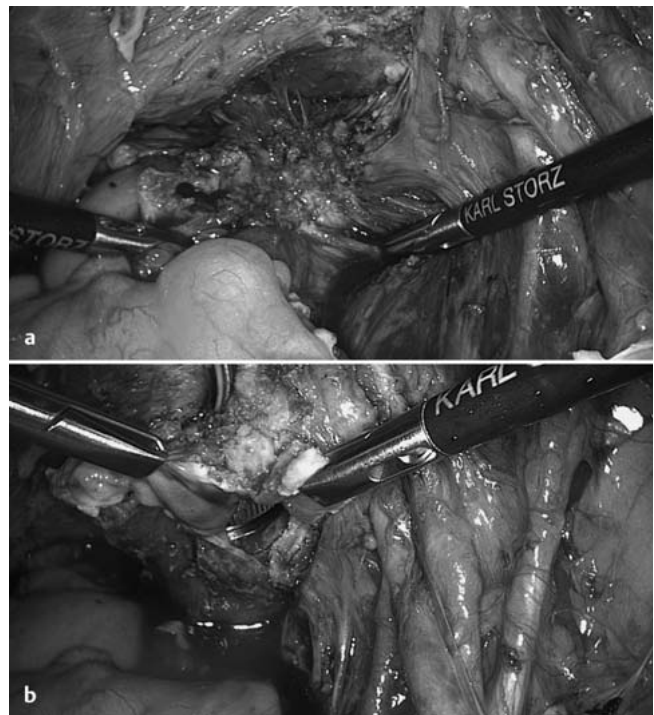

**Abb. 4a** und **b** **a** Endometrioseknoten mit Infiltration des Vaginalpols, unmittelbar lateral davon die Fasern des rechten Plexus hypogastricus inferior. **b** Resektion der vaginalen Endometriose unter Schonung des Plexus hypogastricus inferior.

verfügbaren Therapiedaten sind widersprüchlich. So kommt eine Studie anhand von Re-Interventions-Daten zum Ergebnis, es bestehe das Potenzial zu einer dauerhaften Eradikation durch frühe laparoskopische Operationen [62]. Eine andere Untersuchung an 57 Frauen unter 21 Jahren, die wegen Endometriose laparoskopisch operiert worden waren, sieht den Rezidivverdacht mit einer außergewöhnlich hohen Rate von 56% und mit konstantem Anstieg über den Nachbetrachtungszeitraum von 5 Jahren bestätigt und schließt daraus sogar auf ein besonders hohes Rezidivrisiko nach früher operativer Intervention [63]. Auch in der Rezidivsituation besteht v. a. nach wiederholter Intervention berechnete Zurückhaltung vor einem erneuten operativen Ansatz. Die kumulative Wahrscheinlichkeit für Wiederholungseingriffe liegt bei mindestens 15–20%, wobei eine erhebliche Voreingenommenheit in den Literaturdaten vermutet wird [64]. Bezogen auf das Leitsymptom Schmerz wird für den Rezidiveingriff die gleiche Effektivität, aber auch vergleichbare Limitierungen angegeben [65], bezogen auf das Symptom unerfüllter Kinderwunsch aber nur eine halb so hohe erzielbare Schwangerschaftsrate wie beim Ersteingriff.

### Fazit

▼ Ziel der vorliegenden Übersicht war es, kontroverse Aspekte und Herausforderungen bei der operativen Therapie der Endometriose zu diskutieren. Deutlich wird, dass sowohl bei der präoperativen Indikationsstellung und Aufklärung wie auch bei der technischen Durchführung von Endometrioseoperationen erhebliche Herausforderungen verbleiben.

## Interessenkonflikt

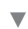

Nein.

## Literatur

- 1 Deguara CS, Pepas L, Davis C. Does minimally invasive surgery for endometriosis improve pelvic symptoms and quality of life? *Curr Opin Obstet Gynecol* 2012; 24: 241–244
- 2 AWMF. Diagnostik und Therapie der Endometriose. AWMF Leitlinien Register 015/045. awmf.org/leitlinien/detail/ll/015-045.html
- 3 Wattiez A, Puga M, Albornoz J et al. Surgical strategy in endometriosis. *Best Pract Res Clin Obstet Gynaecol* 2013; 27: 381–392
- 4 Kondo W, Bourdel N, Zomer MT et al. Surgery for deep infiltrating endometriosis: technique and rationale. *Front Biosci (Elite Ed)* 2013; 5: 316–332
- 5 Berkes E, Bokor A, Rigó jr. J. Current treatment of endometriosis with laparoscopic surgery. *Orv Hetil* 2010; 151: 1137–1144
- 6 Fritzer N, Tammaa A, Salzer H et al. Effects of surgical excision of endometriosis regarding quality of life and psychological well-being: a review. *Womens Health (Lond Engl)* 2012; 8: 427–435
- 7 Koninckx PR, Ussia A, Adamyan L et al. Deep endometriosis: definition, diagnosis, and treatment. *Fertil Steril* 2012; 98: 564–571
- 8 Pandis GK, Saridogan E, Windsor AC et al. Short-term outcome of fertility-sparing laparoscopic excision of deeply infiltrating pelvic endometriosis performed in a tertiary referral center. *Fertil Steril* 2010; 93: 39–45
- 9 Minelli L, Ceccaroni M, Ruffo G et al. Laparoscopic conservative surgery for stage IV symptomatic endometriosis: short-term surgical complications. *Fertil Steril* 2010; 94: 1218–1222
- 10 Schonman R, Dotan Z, Weintraub AY et al. Deep endometriosis inflicting the bladder: long-term outcomes of surgical management. *Arch Gynecol Obstet* 2013; DOI: 10.1007/s00404-013-2917-6
- 11 Kovoov E, Nassif J, Miranda-Mendoza I et al. Endometriosis of bladder: outcomes after laparoscopic surgery. *J Minim Invasive Gynecol* 2010; 17: 600–604
- 12 Taylor E, Williams C. Surgical treatment of endometriosis: location and patterns of disease at reoperation. *Fertil Steril* 2010; 93: 57–61
- 13 Lessey BA, Higdon HL 3rd, Miller SE et al. Intraoperative detection of subtle endometriosis: a novel paradigm for detection and treatment of pelvic pain associated with the loss of peritoneal integrity. *J Vis Exp* 2012; DOI: 10.3791/4313
- 14 Alkatout I, Mettler L, Beteta C et al. Combined surgical and hormone therapy for endometriosis is the most effective treatment: prospective, randomized, controlled trial. *J Minim Invasive Gynecol* 2013; 20: 473–481
- 15 Vercellini P, Somigliana E, Consonni D et al. Surgical versus medical treatment for endometriosis-associated severe deep dyspareunia: I. Effect on pain during intercourse and patient satisfaction. *Hum Reprod* 2012; 27: 3450–3459
- 16 Vercellini P, Frattaruolo MP, Somigliana E et al. Surgical versus low-dose progestin treatment for endometriosis-associated severe deep dyspareunia II: effect on sexual functioning, psychological status and health-related quality of life. *Hum Reprod* 2013; 28: 1221–1230
- 17 Porpora MG, Pallante D, Ferro A et al. Pain and ovarian endometrioma recurrence after laparoscopic treatment of endometriosis: a long-term prospective study. *Fertil Steril* 2010; 93: 716–721
- 18 Hayasaka S, Ugajin T, Fujii O et al. Risk factors for recurrence and re-recurrence of ovarian endometriomas after laparoscopic excision. *J Obstet Gynaecol Res* 2011; 37: 581–585
- 19 Uncu G, Kasapoglu I, Ozerkan K et al. Prospective assessment of the impact of endometriomas and their removal on ovarian reserve and determinants of the rate of decline in ovarian reserve. *Hum Reprod* 2013; 28: 2140–2145
- 20 Raffi F, Metwally M, Amer S. The impact of excision of ovarian endometrioma on ovarian reserve: a systematic review and meta-analysis. *J Clin Endocrinol Metab* 2012; 97: 3146–3154
- 21 Streuli I, de Ziegler D, Gayet V et al. In women with endometriosis anti-Müllerian hormone levels are decreased only in those with previous endometrioma surgery. *Hum Reprod* 2012; 27: 3294–3303
- 22 Urman B, Alper E, Yakin K et al. Removal of unilateral endometriomas is associated with immediate and sustained reduction in ovarian reserve. *Reprod Biomed Online* 2013; 27: 212–216
- 23 Celik HG, Dogan E, Okyay E et al. Effect of laparoscopic excision of endometriomas on ovarian reserve: serial changes in the serum antimüllerian hormone levels. *Fertil Steril* 2012; 97: 1472–1478
- 24 Canis M, Kondo W, Botchorishvili R et al. Surgical arrows should be identified on the cyst wall. *Fertil Steril* 2013; 99: e7
- 25 Donnez J, Squifflet J, Jadoul P et al. Fertility preservation in women with ovarian endometriosis. *Front Biosci (Elite Ed)* 2012; 4: 1654–1662
- 26 Bourdel N, Roman H, Mage G et al. Surgery for the management of ovarian endometriomas: from the physiopathology to the pre-, peri- and postoperative treatment. *Gynecol Obstet Fertil* 2011; 39: 709–721
- 27 Somigliana E, Benaglia L, Viganò P et al. Surgical measures for endometriosis-related infertility: a plea for research. *Placenta* 2011; 32 (Suppl. 3): S238–S242
- 28 Hart RJ, Hickey M, Maouris P et al. Excisional surgery versus ablative surgery for ovarian endometriomata. *Cochrane Database Syst Rev* 2008; 2: CD004992
- 29 Dan H, Limin F. Laparoscopic ovarian cystectomy versus fenestration/coagulation or laser vaporization for the treatment of endometriomas: a meta-analysis of randomized controlled trials. *Gynecol Obstet Invest* 2013; 76: 75–82
- 30 Litta P, D'Agostino G, Conte L et al. Anti-Müllerian hormone trend after laparoscopic surgery in women with ovarian endometrioma. *Gynecol Endocrinol* 2013; 29: 452–454
- 31 Ferrero S, Venturini PL, Gillott DJ et al. Hemostasis by bipolar coagulation versus suture after surgical stripping of bilateral ovarian endometriomas: a randomized controlled trial. *J Minim Invasive Gynecol* 2012; 19: 722–730
- 32 Ruiz-Flores FJ, Garcia-Velasco JA. Is there a benefit for surgery in endometrioma-associated infertility? *Curr Opin Obstet Gynecol* 2012; 24: 136–140
- 33 Kössi J, Setälä M, Mäkinen J et al. Quality of life and sexual function 1 year after laparoscopic rectosigmoid resection for endometriosis. *Colorectal Dis* 2013; 15: 102–108
- 34 Setälä M, Härkki P, Matomäki J et al. Sexual functioning, quality of life and pelvic pain 12 months after endometriosis surgery including vaginal resection. *Acta Obstet Gynecol Scand* 2012; 91: 692–698
- 35 Bassi MA, Podgaec S, Dias jr. JA et al. Quality of life after segmental resection of the rectosigmoid by laparoscopy in patients with deep infiltrating endometriosis with bowel involvement. *J Minim Invasive Gynecol* 2011; 18: 730–733
- 36 Ruffo G, Sartori A, Crippa S et al. Laparoscopic rectal resection for severe endometriosis of the mid and low rectum: technique and operative results. *Surg Endosc* 2012; 26: 1035–1040
- 37 Maytham GD, Dowson HM, Levy B et al. Laparoscopic excision of rectovaginal endometriosis: report of a prospective study and review of the literature. *Colorectal Dis* 2010; 12: 1105–1112
- 38 Koh CE, Juszczak K, Cooper MJ et al. Management of deeply infiltrating endometriosis involving the rectum. *Dis Colon Rectum* 2012; 55: 925–931
- 39 Borghese B, Santulli P, Streuli I et al. [Recurrence of pain after surgery for deeply infiltrating endometriosis: How does it happen? How to manage?]. *J Gynecol Obstet Biol Reprod (Paris)* 2012; DOI: 10.1016/j.jgyn.2012.11.009
- 40 Meuleman C, Tomassetti C, Wolthuis A et al. Clinical outcome after radical excision of moderate-severe endometriosis with or without bowel resection and reanastomosis: a prospective cohort study. *Ann Surg* 2013; Apr 10 [Epub ahead of print]; PMID: 23579578
- 41 Dubuisson J, Pont M, Roy P et al. Female sexuality after surgical treatment of symptomatic deep pelvic endometriosis. *Gynecol Obstet Fertil* 2013; 41: 38–44
- 42 Donnez J, Squifflet J. Complications, pregnancy and recurrence in a prospective series of 500 patients operated on by the shaving technique for deep rectovaginal endometriotic nodules. *Hum Reprod* 2010; 25: 1949–1958
- 43 Boesgaard-Kjer DH, Boesgaard-Kjer D, Kjer JJ. Well-leg compartment syndrome after gynecological laparoscopic surgery. *Acta Obstet Gynecol Scand* 2013; 92: 598–600
- 44 Tomassetti C, Meuleman C, Vanacker B et al. Lower limb compartment syndrome as a complication of laparoscopic laser surgery for severe endometriosis. *Fertil Steril* 2009; 92: 2038.e9–2038.e12
- 45 Brouwer R, Woods RJ. Rectal endometriosis: results of radical excision and review of published work. *ANZ J Surg* 2007; 77: 562–571
- 46 Canon B, Collinet P, Piessen G et al. Segmentary rectal resection and rectal shaving by laparoscopy for endometriosis: peri-operative morbidity. *Gynecol Obstet Fertil* 2013; 41: 275–281

- 47 Roman H, Loisel C, Resch B *et al.* Delayed functional outcomes associated with surgical management of deep rectovaginal endometriosis with rectal involvement: giving patients an informed choice. *Hum Reprod* 2010; 25: 890–899
- 48 Darai E, Touboul C, Chéreau E *et al.* Segmental resection for colorectal endometriosis: are there alternatives? *Gynecol Obstet Fertil* 2012; 40: 116–120
- 49 Roman H, Vassilieff M, Gourcerol G *et al.* Surgical management of deep infiltrating endometriosis of the rectum: pleading for a symptom-guided approach. *Hum Reprod* 2011; 26: 274–281
- 50 Zilberman S, Ballester M, Touboul C *et al.* Partial colectomy is a risk factor for urologic complications of colorectal resection for endometriosis. *J Minim Invasive Gynecol* 2013; 20: 49–55
- 51 Deffieux X, Raibaut P, Hubeaux K *et al.* Voiding dysfunction after surgical resection of deeply infiltrating endometriosis: pathophysiology and management. *Gynecol Obstet Fertil* 2007; 35 (Suppl. 1): S8–S13
- 52 Dubernard G, Rouzier R, Piketty M *et al.* Assessment of the urinary side effects after surgery for deep pelvic endometriosis. *Gynecol Obstet Fertil* 2007; 35 (Suppl. 1): S1–S7
- 53 Ceccaroni M, Clarizia R, Roviglione G *et al.* Neuro-anatomy of the posterior parametrium and surgical considerations for a nerve-sparing approach in radical pelvic surgery. *Surg Endosc* 2013; DOI: 10.1007/s00464-013-3043-2
- 54 Possover M, Chiantera V, Baekelandt J. Anatomy of the sacral roots and the pelvic splanchnic nerves in women using the LANN technique. *Surg Laparosc Endosc Percutan Tech* 2007; 17: 508–510
- 55 Ceccaroni M, Clarizia R, Bruni F *et al.* Nerve-sparing laparoscopic eradication of deep endometriosis with segmental rectal and parametrial resection: the Negrar method. A single-center, prospective, clinical trial. *Surg Endosc* 2012; 26: 2029–2045
- 56 Seracchioli R, Mabrouk M, Manuzzi L *et al.* Importance of retroperitoneal ureteric evaluation in cases of deep infiltrating endometriosis. *J Minim Invasive Gynecol* 2008; 15: 435–439
- 57 Kondo W, Branco AW, Trippia CH *et al.* Retrocervical deep infiltrating endometriotic lesions larger than thirty millimeters are associated with an increased rate of ureteral involvement. *J Minim Invasive Gynecol* 2013; 20: 100–103
- 58 Mereu L, Gagliardi ML, Clarizia R *et al.* Laparoscopic management of ureteral endometriosis in case of moderate-severe hydroureteronephrosis. *Fertil Steril* 2010; 93: 46–51
- 59 Miranda-Mendoza I, Kovoor E, Nassif J *et al.* Laparoscopic surgery for severe ureteric endometriosis. *Eur J Obstet Gynecol Reprod Biol* 2012; 165: 275–279
- 60 Brosens I, Gordts S, Benagiano G. Endometriosis in adolescents is a hidden, progressive and severe disease that deserves attention, not just compassion. *Hum Reprod* 2013; 28: 2026–2031
- 61 Janssen EB, Rijkers AC, Hoppenbrouwers K *et al.* Prevalence of endometriosis diagnosed by laparoscopy in adolescents with dysmenorrhea or chronic pelvic pain: a systematic review. *Hum Reprod Update* 2013; 19: 570–582
- 62 Yeung jr. P, Sinervo K, Winer W *et al.* Complete laparoscopic excision of endometriosis in teenagers: is postoperative hormonal suppression necessary? *Fertil Steril* 2011; 95: 1909–1912, 1912.e1
- 63 Tandoi I, Somigliana E, Riparini J *et al.* High rate of endometriosis recurrence in young women. *J Pediatr Adolesc Gynecol* 2011; 24: 376–379
- 64 Vercellini P, Barbara G, Abbiati A *et al.* Repetitive surgery for recurrent symptomatic endometriosis: what to do? *Eur J Obstet Gynecol Reprod Biol* 2009; 146: 15–21
- 65 Berlanda N, Vercellini P, Fedele L. The outcomes of repeat surgery for recurrent symptomatic endometriosis. *Curr Opin Obstet Gynecol* 2010; 22: 320–325
